# Supplementary material for: Fall assessment in older people
Source: HighWire-hosted journal article supplement (doi:10.1136/bmj.d5153), 2011-09-14
Supplement: cloj854455.w1_default.pdf [file cloj854455.w1_default.pdf]

**Web table 1.** Examples of validated tests and tools available for screening and assessment of fall risk

| Timed Up and Go Test (TUGT) <sup>10-12</sup> <u>Screening in the Community</u>                              |                                                                                                                                                                                                                                                                                                                                                                  |
|-------------------------------------------------------------------------------------------------------------|------------------------------------------------------------------------------------------------------------------------------------------------------------------------------------------------------------------------------------------------------------------------------------------------------------------------------------------------------------------|
| Description                                                                                                 | The TUGT measures the time taken for a person to rise from a chair, walk three metres at normal pace with their usual assistive device, turn, return to the chair and sit down.                                                                                                                                                                                  |
| Criterion                                                                                                   | A time of $\geq 12$ seconds indicates increased risk of falling                                                                                                                                                                                                                                                                                                  |
| Time to undertake test                                                                                      | 1–2 minutes                                                                                                                                                                                                                                                                                                                                                      |
| Sit-to-Stand Test (STST) <sup>5</sup> <u>Screening in the Community</u>                                     |                                                                                                                                                                                                                                                                                                                                                                  |
| Description                                                                                                 | The STST provides a measure of lower limb strength, speed and coordination. It involves the time taken to complete five STSTs as fast as possible from a standard height (43 cm) chair.                                                                                                                                                                          |
| Criterion                                                                                                   | A time of $\geq 12$ seconds indicates increased risk of falling                                                                                                                                                                                                                                                                                                  |
| Time to undertake test                                                                                      | 1–2 minutes                                                                                                                                                                                                                                                                                                                                                      |
| Alternate Step Test (AST) <sup>16</sup> - <u>Screening in the Community</u>                                 |                                                                                                                                                                                                                                                                                                                                                                  |
| Description                                                                                                 | AST provides a measure of lateral stability and involves the time taken to complete eight steps, alternating between left and right foot, as fast as possible onto a step that is 19 cm high and 40 cm deep.                                                                                                                                                     |
| Criterion                                                                                                   | A time of $\geq 10$ seconds indicates increased risk of falling                                                                                                                                                                                                                                                                                                  |
| Time to undertake test                                                                                      | 1–2 minutes                                                                                                                                                                                                                                                                                                                                                      |
| FROP-Com Screen <sup>17</sup> <u>Screening in the Community</u>                                             |                                                                                                                                                                                                                                                                                                                                                                  |
| Description                                                                                                 | A three-item fall risk screening tool, developed from the FROP-Com assessment tool. The three items are a history of falls in the past 12 months; observations of steadiness while standing up, walking three metres, turning returning to the chair and sitting down; and self report of need for assistance in performing domestic activities of daily living. |
| Criterion                                                                                                   | A score of $>3$ indicates increased risk of falling                                                                                                                                                                                                                                                                                                              |
| Time to undertake test                                                                                      | 1–2 minutes                                                                                                                                                                                                                                                                                                                                                      |
| Falls Risk Assessment Tool (FRAT) <sup>18</sup> <u>Screening in the Community / Emergency Department</u>    |                                                                                                                                                                                                                                                                                                                                                                  |
| Description                                                                                                 | A five item screen; history of a fall in the previous year; four or more regularly prescribed medications; diagnosis of stroke or Parkinson's disease; self reported problems with balance; and inability to rise from a chair without using arms.                                                                                                               |
| Criterion                                                                                                   | A score of 3 or more indicates increased risk of falls                                                                                                                                                                                                                                                                                                           |
| Time to undertake test                                                                                      | 1-2 mins                                                                                                                                                                                                                                                                                                                                                         |
| Prevention of Falls in the Elderly Trial (PROFET) <sup>9</sup> <u>Screening in the Emergency Department</u> |                                                                                                                                                                                                                                                                                                                                                                  |
| Description                                                                                                 | Used in people presenting to ED following a fall. Three simple                                                                                                                                                                                                                                                                                                   |

|                                                                                                 |                                                                                                                                                                                         |
|-------------------------------------------------------------------------------------------------|-----------------------------------------------------------------------------------------------------------------------------------------------------------------------------------------|
|                                                                                                 | questions which identify people at increased risk of further falls<br>– 1) an additional falls over the past 12 months 2) a fall occurring indoors, 3) inability to get up after a fall |
| Criterion                                                                                       | Yes to any of the questions should trigger further assessment                                                                                                                           |
| Time to undertake test                                                                          | and intervention<br>1–2 minutes                                                                                                                                                         |
| <b>STRATIFY<sup>19</sup> Screening in the Hospital Setting</b>                                  |                                                                                                                                                                                         |
| Description                                                                                     | 5 item questionnaire with questions relating to falls, cognition, transfer and mobility skills, vision and toileting practice.                                                          |
| Criterion                                                                                       | A score of >2 identifies high risk fallers                                                                                                                                              |
| Time to undertake test                                                                          | 1-2 minutes                                                                                                                                                                             |
| <b>Modified STRATIFY<sup>14</sup> Screening in the Hospital Setting</b>                         |                                                                                                                                                                                         |
| Description                                                                                     | 6 item weighted questionnaire with questions relating to falls, cognition, transfer and mobility skills, vision and toileting practice.                                                 |
| Criterion                                                                                       | A score of $\geq 9$ identifies high risk fallers                                                                                                                                        |
| Time to undertake test                                                                          | 1-2 minutes                                                                                                                                                                             |
| <b>RACF Fall Screen<sup>15</sup> Screening in the Nursing and Residential Aged Care Setting</b> |                                                                                                                                                                                         |
| Description                                                                                     | Clinical algorithm based on persons ability to stand unaided, previous falls, medication use and continence status                                                                      |
| Criterion                                                                                       | Depending of risk factors identified, outcome will be either high or low risk of falls                                                                                                  |
| Time to undertake test                                                                          | 1-2 minutes                                                                                                                                                                             |

**Web Table 2** Examples of validated tests and tools available for assessing fall risk

|                                                                                          |                                                                                                                                                                                                                                                                                                                                                                                                                          |
|------------------------------------------------------------------------------------------|--------------------------------------------------------------------------------------------------------------------------------------------------------------------------------------------------------------------------------------------------------------------------------------------------------------------------------------------------------------------------------------------------------------------------|
| <b>Performance Oriented Mobility Assessment<sup>20</sup> Assessment in the Community</b> |                                                                                                                                                                                                                                                                                                                                                                                                                          |
| Description                                                                              | The POMA is a simple clinical scale that grades performance on 9 balance and 7 gait items, with items graded from 0-1 or from 0-2. The balance items encompass sitting balance, standing up from a chair, standing balance, ability to withstand a nudge, turning and sitting down. The gait items encompass gait initiation, step length and height, step symmetry and continuity, trunk sway, walking path and stance. |
| Criterion                                                                                | A score lower than 19 indicates an increased risk of falling.                                                                                                                                                                                                                                                                                                                                                            |
| Time to undertake test                                                                   | 10-15 minutes                                                                                                                                                                                                                                                                                                                                                                                                            |
| <b>Quickscreen<sup>13</sup> Assessment in the Community</b>                              |                                                                                                                                                                                                                                                                                                                                                                                                                          |

|                                                                                                            |                                                                                                                                                                                                                                                                                                                                                                                                                                                                                                                                                                                                                                                            |
|------------------------------------------------------------------------------------------------------------|------------------------------------------------------------------------------------------------------------------------------------------------------------------------------------------------------------------------------------------------------------------------------------------------------------------------------------------------------------------------------------------------------------------------------------------------------------------------------------------------------------------------------------------------------------------------------------------------------------------------------------------------------------|
| Description                                                                                                | QuickScreen is a risk-assessment tool designed for use by practice and rural nurses, allied health workers and GPs. It allows the clinician to estimate the level of increased fall risk and determine which sensorimotor systems are impaired. The QuickScreen consists of the following measures: previous falls, medication use, vision, peripheral sensation, lower limb strength, balance and coordination. The fall assessment requires minimal equipment: a low-contrast eye chart, a filament for measuring touch sensation, and a small step.                                                                                                     |
| Criterion                                                                                                  | A score of 4 or more indicates an increased risk of falling                                                                                                                                                                                                                                                                                                                                                                                                                                                                                                                                                                                                |
| Time to undertake test                                                                                     | 10 minutes                                                                                                                                                                                                                                                                                                                                                                                                                                                                                                                                                                                                                                                 |
| <u>FallScreen — Physiological Profile Assessment<sup>21</sup> Assessment in the Community</u>              |                                                                                                                                                                                                                                                                                                                                                                                                                                                                                                                                                                                                                                                            |
| Description                                                                                                | FallScreen is a validated risk-assessment tool that can be linked to evidence-based approaches to interventions. It provides detailed quantitative information on the physiological domains contributing to postural stability. FallScreen contains five items: an assessment of vision, peripheral sensation, lower limb strength, reaction time and body sway. The combined results provide an overall fall risk score whilst results in each physiological domain guide intervention.                                                                                                                                                                   |
| Criterion                                                                                                  | A score of 1 or more indicates an increased risk of falling                                                                                                                                                                                                                                                                                                                                                                                                                                                                                                                                                                                                |
| Time to undertake test                                                                                     | 15–20 minutes                                                                                                                                                                                                                                                                                                                                                                                                                                                                                                                                                                                                                                              |
| <u>FROP-Com (Falls Risk for Older People — community version)<sup>17</sup> Assessment in the Community</u> |                                                                                                                                                                                                                                                                                                                                                                                                                                                                                                                                                                                                                                                            |
| Description                                                                                                | The FROP-Com is a detailed fall risk factor assessment tool. It includes 13 risk factors in 26 questions with either dichotomous (0–1) or ordinal (0–3) scoring. A total of these individual scores provides an overall score of fall risk (range 0–60), with higher scores indicative of greater risk. The tool includes guidelines on scoring each risk factor, and evidence-based referral or interventions. No special equipment is required. The full FROP-Com and its guidelines are available at <a href="http://www.mednwh.unimelb.edu.au/research/research_falls_service.htm">www.mednwh.unimelb.edu.au/research/research_falls_service.htm</a> . |
| Criterion                                                                                                  | A score >18 indicates a high risk of falls                                                                                                                                                                                                                                                                                                                                                                                                                                                                                                                                                                                                                 |
| Time to undertake test                                                                                     | 10–15 minutes                                                                                                                                                                                                                                                                                                                                                                                                                                                                                                                                                                                                                                              |
| <u>Predict-FIRST<sup>22</sup> Assessment in the Rehabilitation Setting</u>                                 |                                                                                                                                                                                                                                                                                                                                                                                                                                                                                                                                                                                                                                                            |
| Description                                                                                                | Predict-FIRST is a screening tools validated in rehabilitation wards that provides estimates of absolute risk of falls based on the presence of the following five factors: male gender, CNS medication use, a fall in the past year, need for frequent toileting and inability to do the tandem stance test. No special equipment is required.                                                                                                                                                                                                                                                                                                            |
| Criterion                                                                                                  | Risk factors present: 0 = 2%, 1 = 4%, 2 = 9%, 3 = 18%, 4 = 33%, 5 = 52%.                                                                                                                                                                                                                                                                                                                                                                                                                                                                                                                                                                                   |
| Time to undertake test                                                                                     | < 10 minutes                                                                                                                                                                                                                                                                                                                                                                                                                                                                                                                                                                                                                                               |
